# Supplementary material
Source: publisher figshare collection journal article supplement (https://karger.figshare.com/ndownloader/files/30806764)
Supplement: Supplementary file 1 [file 30806764]

**Supplementary Table 4. Results of multivariable logistic regression analysis of participants characteristics related to PIM use in the overall study population**

| Participants characteristics | Odds ratio | Confidence interval 95% | P-value |
| --- | --- | --- | --- |
| BMI [kg/m²] | 1.02 | 0.98 - 1.07 | 0.293 |
| Current smoking (yes/no) | 1.13 | 0.59 - 2.14 | 0.714 |
| Alcohol consumption (yes/no) | 1.20 | 0.66 - 2.17 | 0.544 |
| Years of education | 0.93 | 0.87 - 0.99 | 0.017* |
| Living alone (yes/no) | 0.82 | 0.56 - 1.21 | 0.315 |

Notes and abbreviations; N=865. Smoking, alcohol consumption and living alone were included as binary variables. BMI and years of education were included as continuous variables. BMI, body mass index
